# Supplementary material for: Activation of CYCD7;1 in the central cell and early endosperm overcomes cell‐cycle arrest in the Arabidopsis female gametophyte, and promotes early endosperm and embryo development
Source: PubMed Central journal article supplement (PMC5102630; doi:10.1111/tpj.12957), 2015-10-01

Figure\_S5

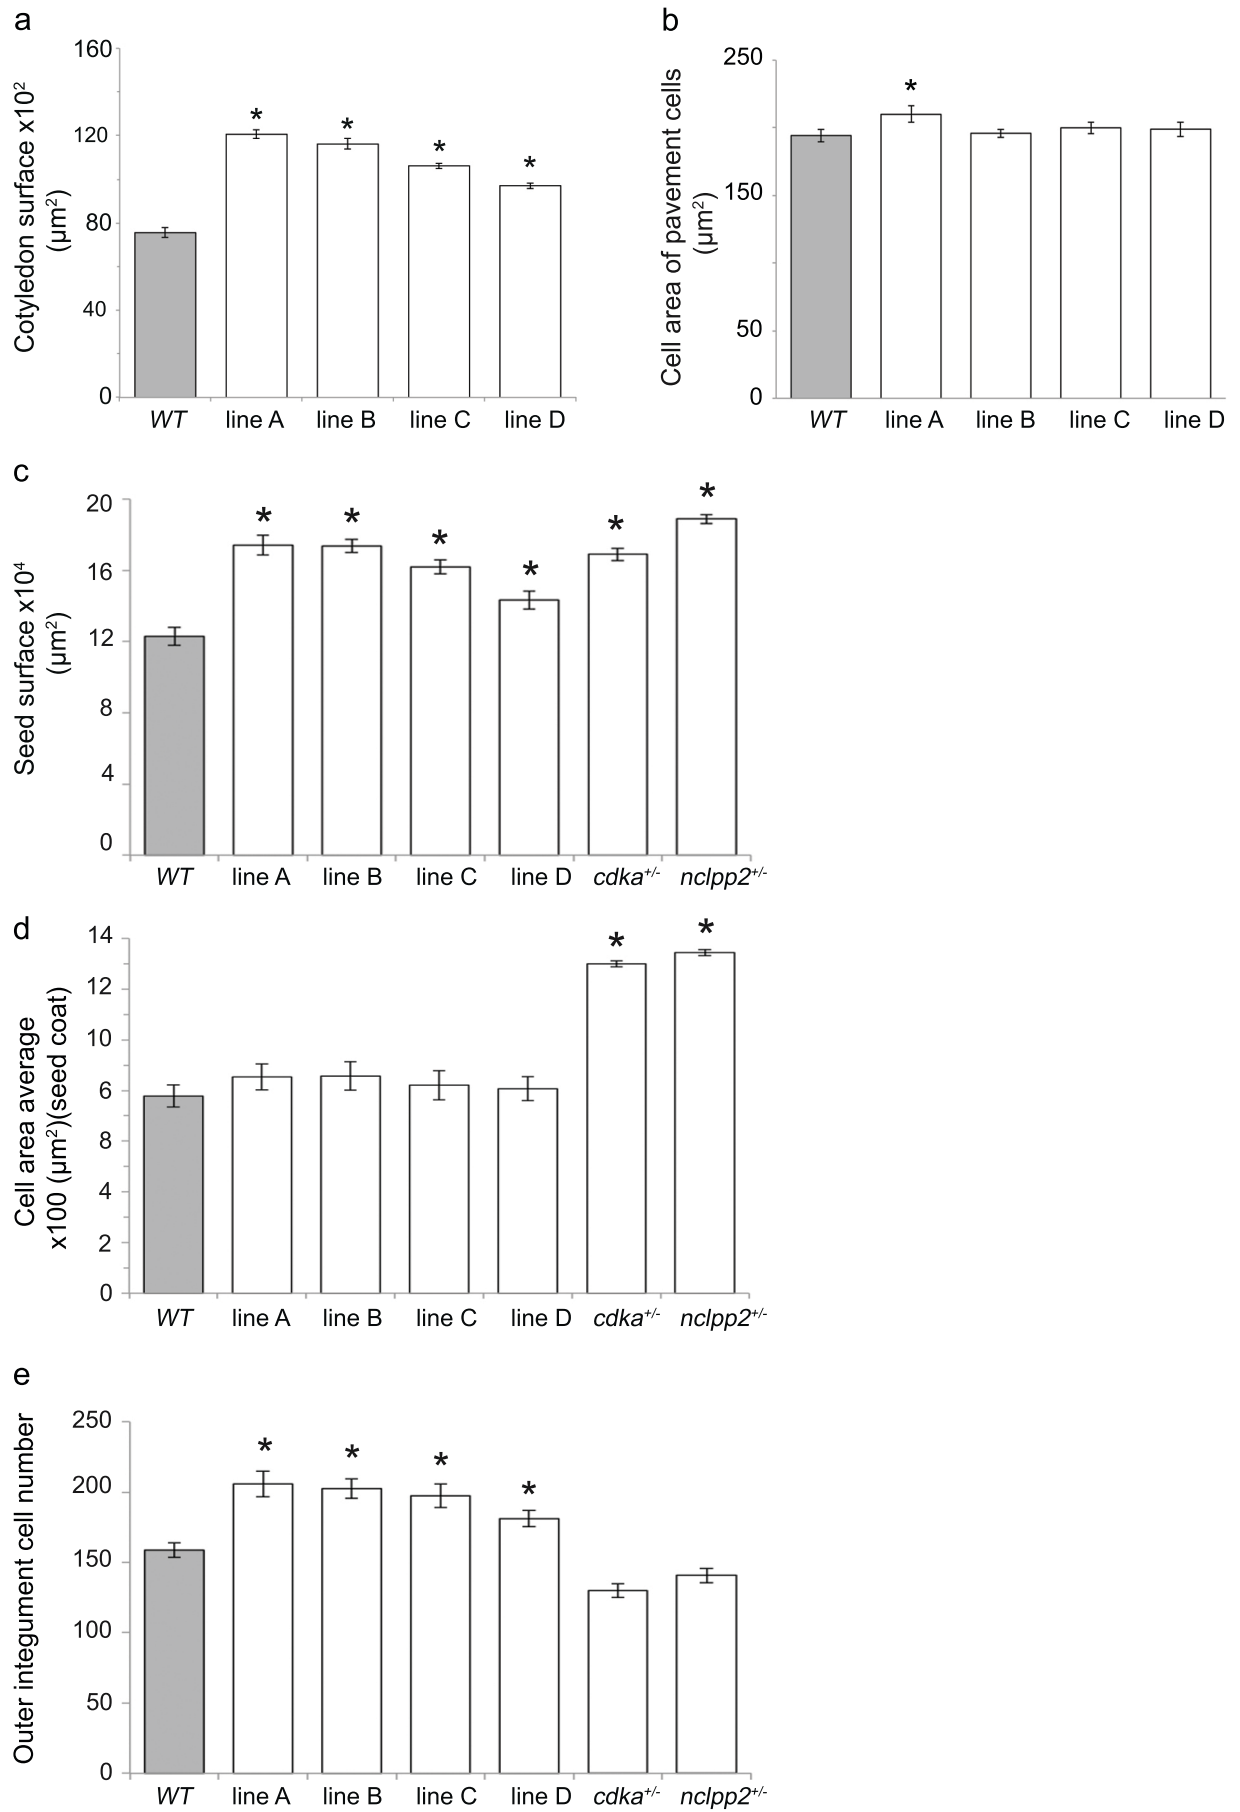

Supplement: TPJ-84-41-s005.pdf [file TPJ-84-41-s005.pdf]
